# Supplementary material for: Fratricide activity of MafB protein of N. meningitidis strain B16B6
Source: PubMed Central journal article supplement (PMC4524018; doi:10.1186/s12866-015-0493-6), 2015-08-05
Supplement: 12866_2015_493_MOESM1_ESM.pdf [file 12866_2015_493_MOESM1_ESM.pdf]

**Table S1.** Primers used in this study

| Goal PCR                                          | Fragment <sup>a</sup> | Primer name <sup>b</sup>   | Sequence (5'→3') <sup>c</sup>                                                            | Remarks       |
|---------------------------------------------------|-----------------------|----------------------------|------------------------------------------------------------------------------------------|---------------|
| <i>Preparation of knock out constructs</i>        |                       |                            |                                                                                          |               |
| $\Delta maf_{MGI-2}$                              | a                     | FwNMC0595<br>RvNMC0595     | CGCGCGAGATCTTGGAAAATTACGAAAGAGCAAGGTCAAGATTTA<br>CGCGCGCCATGGGGCGGGTATGCCGGTCAGTGTGCCGCA | BglII<br>NcoI |
|                                                   | b                     | FwNMC1790N<br>RvNMC1790E   | CGCGCGCATATGACCGTGAAACCGCTGCGAAGACTG<br>CGCGCGGATATCAAAGCGGACGGTGTAACCAA                 | NdeI<br>EcoRV |
| $\Delta maf_{B2IB-CTs_{MGI-2}}$                   | b                     | FwNMC1790B<br>RvNMC1790Nc  | CGCGCGAGATCTACCGTGAAACCGCTGCGAAGACTG<br>CGCGCGCCATGGAAAAGCGGACGGTGTAACCAA                | BglII<br>NcoI |
|                                                   | c                     | FwNMC0602<br>RvNMC0603     | CGCGCGCATATGATGATGAGTGTAAGAATTATTC<br>CGCGCGGATATCTCAACTATAATCATTTTTTCTTAAAG             | NdeI<br>EcoRV |
| $\Delta maf_{MGI-1}$                              | d                     | FwNMC1788<br>RvNMC1788     | CGCGCGAGATCTATGATGGAAACACAGCTTTACATC<br>CGCGCGCCATGGGGCGGGTATGCCGGTCAGTGTGCCGCA          | BglII<br>NcoI |
|                                                   | b                     | FwNMC1790N<br>RvNMC1790E   | CGCGCGCATATGACCGTGAAACCGCTGCGAAGACTG<br>CGCGCGGATATCAAAGCGGACGGTGTAACCAA                 | NdeI<br>EcoRV |
| $\Delta maf_{BIB-CTs_{MGI-1}}$                    | b                     | FwNMC1790B<br>RvNMC1790Nc  | CGCGCGAGATCTACCGTGAAACCGCTGCGAAGACTG<br>CGCGCGCCATGGAAAAGCGGACGGTGTAACCAA                | BglII<br>NcoI |
|                                                   | e                     | FwNMC1790N<br>RvNMC1790E   | CGCGCGCATATGACCGTGAAACCGCTGCGAAGACTG<br>CGCGCGGATATCAAAGCGGACGGTGTAACCAA                 | NdeI<br>EcoRV |
| $\Delta maf_{MGI-3}$                              | f                     | FwNMC2082<br>RvNMC2082     | CGCGCGAGATCTATGGATCGCGCCACCGCCGACTACATGGGCATGATG<br>CGCGCGCCATGGAGATTTTCTCCTTTGATGAAAAAC | BglII<br>NcoI |
|                                                   | g                     | FwNMC2083N<br>RvNMC2084E   | CGCGCGCATATGCGACACTGCCTTTCTTTCCCACTT<br>CGCGCGGATATCGAGAAATCGACCATTAATCCTTCC             | NdeI<br>EcoRV |
| $\Delta MGI-3$                                    | f                     | FwNMC2082<br>RvNMC2082     | CGCGCGAGATCTATGGATCGCGCCACCGCCGACTACATGGGCATGATG<br>CGCGCGCCATGGAGATTTTCTCCTTTGATGAAAAAC | BglII<br>NcoI |
|                                                   | h                     | FwNMC2095N<br>RvNMC2095E   | CGCGCGCATATGGGTTACCTATCAAATAATTTACCT<br>CGCGCGGATATCAGTTTTTTAATGACATCGGTCTAT             | NdeI<br>EcoRV |
| $\Delta maf_{BIB-CTs_{MGI-3}}$                    | g                     | FwNMC2082B<br>RvNMC2082N   | CGCGCGAGATCTATGGATCGCGCCACCGCCGACTACATGGGCATGATG<br>CGCGCGCCATGGAGATTTTCTCCTTTGATGAAAAAC | BglII<br>NcoI |
|                                                   | h                     | FwNMC2095N<br>RvNMC2095E   | CGCGCGCATATGGGTTACCTATCAAATAATTTACCT<br>CGCGCGGATATCAGTTTTTTAATGACATCGGTCTAT             | NdeI<br>EcoRV |
| <i>Preparation of plasmids for overexpression</i> |                       |                            |                                                                                          |               |
| $MafI_{MGI-3}$                                    |                       | FwMMC2085 fw<br>Re NMC2084 | GCGCGCCATATGATGAAAAAAAATATTTTTTAC<br>GCGCGCCTCGAGTTTTCCAGTGGCTCAAATAATTGTTTC             | NdeI<br>XhoI  |
| $MafI_{MGI-2}$                                    |                       | Fw0598<br>Rev0598          | GCGCGCCATATGAATATATTACCAAGCTGGCTGCGAGTCGG<br>GCGCGCCTCGAGCGCTTGCGAAATAATTCCTTTCTCC       | NdeI<br>XhoI  |

|                                                |           |                                                                             |                                |
|------------------------------------------------|-----------|-----------------------------------------------------------------------------|--------------------------------|
| Toxic domain of<br>MafB <sub>MGI-2</sub>       | Fw0597ct  | GCGCGCCCATGGACTACAAAGACGATGACGACAAGGGG                                      | NcoI, Flag-<br>tagged<br>SacII |
|                                                | Rev0597ct | ACTAAAATTCATGATGGAGCTCAAGGGAAAC<br>GCGCGCCCGCGGCTATTGCACCTTTTAAATGGTTTTAGGG |                                |
| Toxic domain of<br>MafB <sub>MGI-3</sub>       | Fw2084ct  | GCGCGCCCATGGACTACAAAGACGATGACGACAAGAAC                                      | NcoI, Flag-<br>tagged<br>SacII |
|                                                | Rev2084ct | AAGCCAGTTGTTAAATC<br>GCGCGCCCGCGGTCATTGACAAAATATCCAGAATGA                   |                                |
| <i>Cloning procedures</i>                      |           |                                                                             |                                |
| Amplification of the <i>araBAD</i><br>promoter | FwArac    | GCGCGCAGTACTATCGATGCATAATGTGCC                                              | ScaI                           |
|                                                | RevArac   | GCGCGCCCGCGGTCCTACTCAGGAGAGCGT                                              | SacII                          |

---

<sup>a</sup> Letters correspond to the PCR fragments indicated in Figure 1.

<sup>b</sup> Primer names are based on the corresponding gene locus in strain FAM18.

<sup>c</sup> Restriction sites (underlined) used for cloning and sequences for protein tags (italics) for included in primers sequences are indicated.
